# Supplementary material for: Lived experience perspectives on resilience, mental health, and wellbeing: a focus group study of individual, social, and systemic determinants in Aotearoa New Zealand
Source: Research Square preprint supplement (doi:10.21203/rs.3.rs-8133475/v1), 2025-12-10
Supplement: Supplementary file 1 [file 3ca8a5f5ab1e21229946e423.docx]

# Focus Group Guide

*Lived experience perspectives on resilience, mental health, and wellbeing*

**Vignette 1: Mary - Flourishing despite mental illness**

While Mary experiences challenges with her mental health, she describes her life as meaningful and fulfilling. She actively engages in activities that are important to her, such as contributing to her community and spending time in nature, which she finds restorative.

Mary acknowledges that some days are more challenging than others, but she has developed strategies to manage these moments and continues to focus on what brings her joy and purpose.

**Vignette 2: John - Struggling with mental illness**

John has been finding it difficult to cope with his mental health challenges. He describes feeling stuck and unsure about what steps to take to improve his situation.

John often feels that his mental health affects his ability to manage daily activities, and this has become increasingly frustrating for him. He sometimes reflects on what might help but feels it’s hard to make progress.

Q: Thinking about Mary and John’s stories, what stood out to you most about their experiences?

Prompts:

- Why did that part stand out or resonate with you?
- Does anything in their stories remind you of your own life or someone you know?

# Relationship between Mental Health, Wellbeing, and Resilience

**Resilience in Mary and John’s stories**

What role do you think resilience played in their situations?

Prompts:

Can you give an example of resilience from your own life or someone you know?

What helped build that resilience (individual, social, cultural, or structural things)?

**How these concepts connect**

How do you think mental health, wellbeing, and resilience influence one another?

Can you think of an example were improving one area affected the others?

How might addressing mental health challenges improve resilience, or vice versa?

**Building resilience in tough times**

What do you think helps people build resilience, especially in times of stress or difficulty?

Prompts:

- Can you share a specific example of a strategy, resource, or change that fostered resilience?
- What role does community support play?
- What are some key challenges that influence people’s ability to be resilient, and what might help overcome them?

# Individual Factors of Resilience

**Personal strengths and strategies**

Q: In your opinion, what personal things help people like Mary maintain their mental health, resilience, and wellbeing despite challenges?

Prompts:

- What kinds of thoughts, attitudes, or beliefs help? (e.g. hope, purpose, sense of control)
- What day-to-day strategies or routines make a difference (sleep, exercise, time in nature, hobbies, faith, etc.)?
- Can you share an example from your own life or someone you know?

**When it feels hard to cope**

Q: What kinds of factors might contribute to someone feeling stuck or struggling, like John?

Prompts:

- How can things like low mood, trauma, stress, or feeling hopeless affect resilience?
- Can you think of a time when it felt hard to bounce back? What was going on for you then?

# Social / Relational Factors

**Whānau [family], friends, and community**

Q: What role do whānau, family, friends, or local groups/organisations play in supporting people’s mental health, resilience, and wellbeing?

Prompts:

- Can you think of a time when support from others made a difference for you or someone you know?
- What kinds of relationships or connections make it easier to get through tough times?
- Are there any downsides or pressures from relationships that can make things harder?

**Community strengths and resources**

Q: Are there particular strengths or resources in your community that support people’s mental health, resilience, and wellbeing?

Prompts:

- How accessible are these resources to everyone?
- Can you think of a time when one of these resources really made a difference for someone?

# Cultural, Spiritual, and Environmental Factors

**Cultural identity and practices**

Q: Are there cultural or spiritual practices, places, or identities that support resilience, mental health, and wellbeing in your life or community?

**Place, whenua, and natural environment**

Q: How does your environment influence your sense of wellbeing and resilience?

# Structural / Systemic and Service Factors

**Big-picture conditions**

Q: Thinking about your community, what big-picture factors make it easier or harder for people to be mentally well and resilient?

**Role of services**

Q: How do you think health and social services affect people’s mental health, resilience, and wellbeing?

Q: Can you think of an example where a service had a negative impact?

Q: What specific aspects were helpful or unhelpful?

# Closing Questions

**One change**

Q: If you could change one thing to improve mental health, resilience, and wellbeing in your community, what would it be?

**Anything we’ve missed**

Q: Is there anything else you’d like to share about mental health, wellbeing, or resilience that we haven’t discussed?
